# Supplementary material
Source: publisher site journal article supplement (https://www.dovepress.com/article/394078)
Supplement: Supplementary file 1 [file get_supplementary_file.php]

Appendix 1: Associations between specific physical chronic conditions and incident probable depression

| Specific physical chronic conditions | Adjusted Odds Ratio (95% CI) | p-value |
| --- | --- | --- |
| Hypertension | 1.11 (0.85 to 1.46) | 0.433 |
| Diabetes | 1.53 (1.11 to 2.12) | 0.010 |
| Cancer | 2.52 (0.94 to 6.78) | 0.067 |
| Lung diseases | 1.73 (0.59 to 5.08) | 0.318 |
| Liver diseases | 0.49 (0.06 to 3.97) | 0.507 |
| Kidney disease | 1.67 (0.80 to 3.50) | 0.171 |
| Cardiovascular disease | 1.47 (0.91 to 2.38) | 0.118 |
| Rheumatism/arthritis | 1.70 (0.99 to 2.88) | 0.048 |
| Bone diseases/osteoporosis | 1.60 (0.91 to 2.83) | 0.105 |

CI=Confidence Interval
